# Supplementary material
Source: Springer Nature journal article supplement (https://www.springermedizin.de/resource/supplementary/12874_2009_383_MOESM7_ESM.pdf/9434358)

Number of reviews

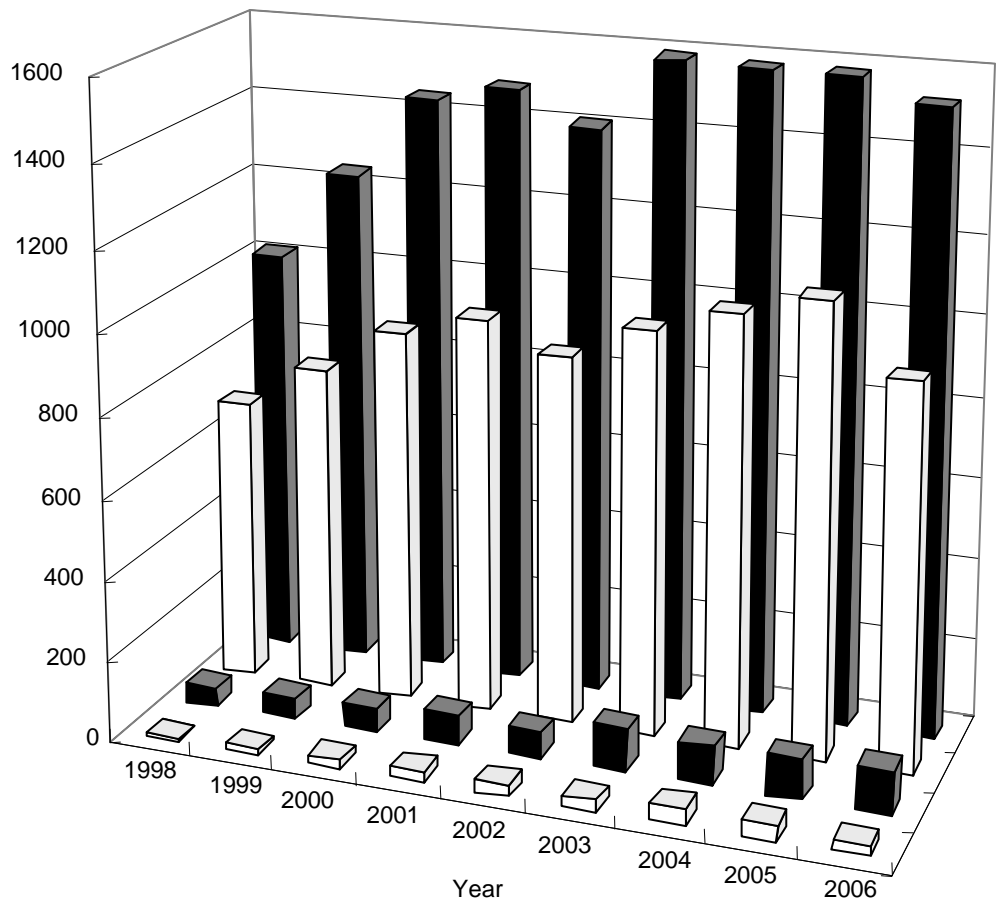

- 100 selected journals
- Journals of SCI category

Supplement: MOESM7 [file 9434358]
